# Supplementary material for: Investigation on the chirality mechanism of chiral carbon quantum dots derived from tryptophan
Source: Royal Society of Chemistry journal article supplement (doi:10.1039/c8ra09649j), 2019-01-01
Supplement: c8ra09649j1.pdf [file c8ra09649j1.pdf]

## Electronic Supplementary Information

### Investigation on chirality mechanism of chiral carbon quantum dots derived from tryptophan

Yingying Wei,<sup>a,b</sup> Lin Chen,<sup>b,c</sup> Junli Wang,<sup>b,c</sup> Xuguang Liu,<sup>\*a,b</sup>  
Yongzhen Yang,<sup>\*b,c</sup> Shiping Yu,<sup>b,d</sup>

<sup>a</sup> College of Materials Science and Engineering, Taiyuan University of Technology, Taiyuan 030024, China.

<sup>b</sup> Key Laboratory of Interface Science and Engineering in Advanced Materials, (Taiyuan University of Technology), Ministry of Education, Taiyuan 030024, China.

<sup>c</sup> Research Center of Advanced Materials Science and Technology, Taiyuan University of Technology, Taiyuan 030024, China.

<sup>d</sup> Interventional Treatment Department, Second Hospital of Shanxi Medical University, Taiyuan 030001, China.

<sup>e</sup> Key Laboratory of Interface Science and Engineering in Advanced Materials of Ministry of Education, Taiyuan University of Technology, Taiyuan 030024, China.

\*Corresponding authors: liuxuguang@tyut.edu.cn (Xuguang Liu), yyztyut@126.com (Yongzhen Yang)

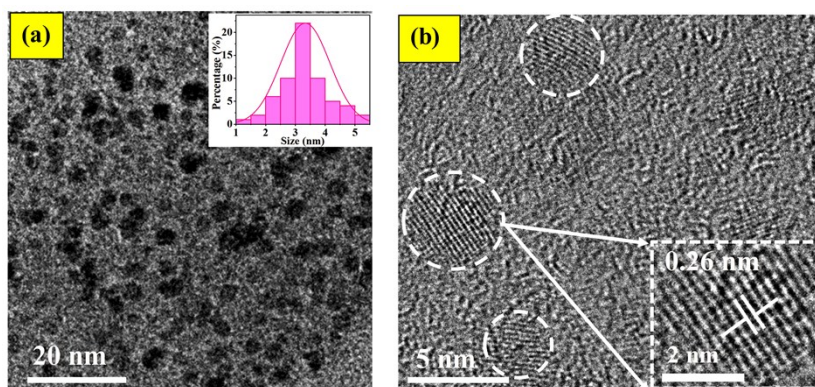

Fig. S1 (a) TEM image and particle size statistics, (b) HRTEM image of D-CQDs

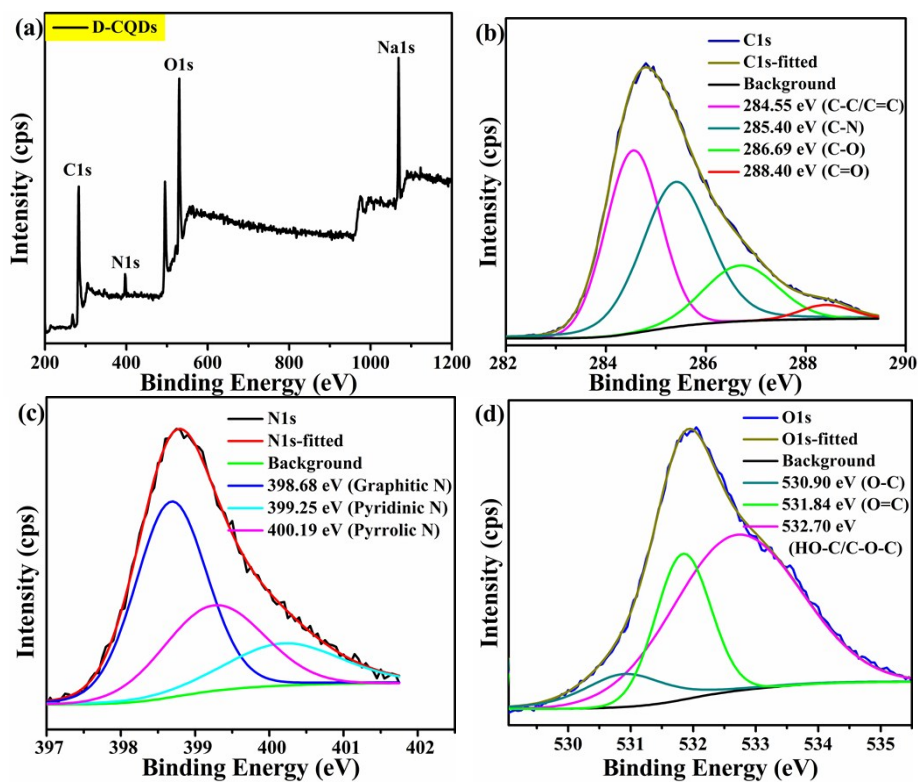

Fig. S2 (a) XPS, (b) C1s, (c) N1s and (d) O1s spectra of D-CQDs

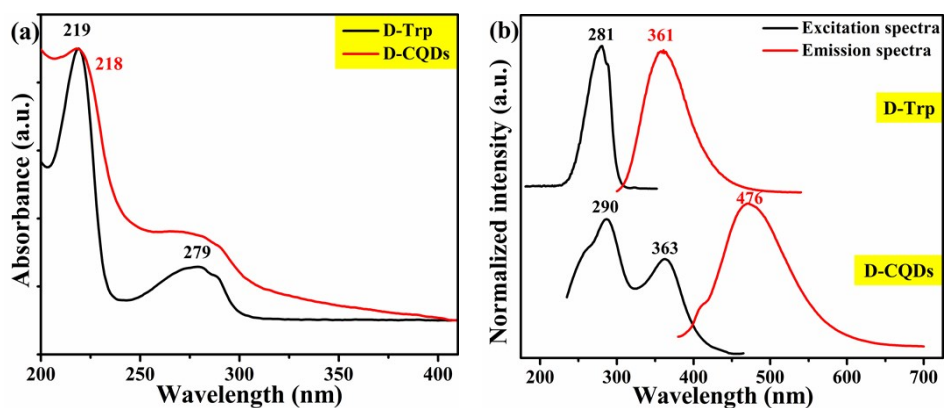

Fig. S3 UV-vis absorption (a), excitation and emission spectra (b) of D-Trp and D-CQDs

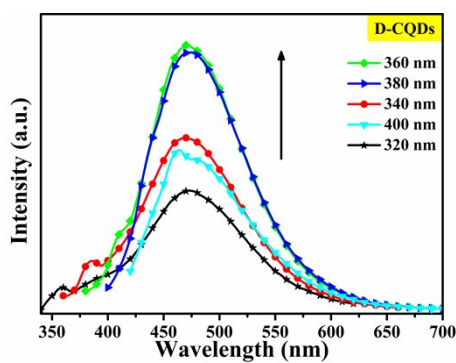

Fig. S4 Emission spectra of D-CQDs aqueous solutions at different excitation wavelengths

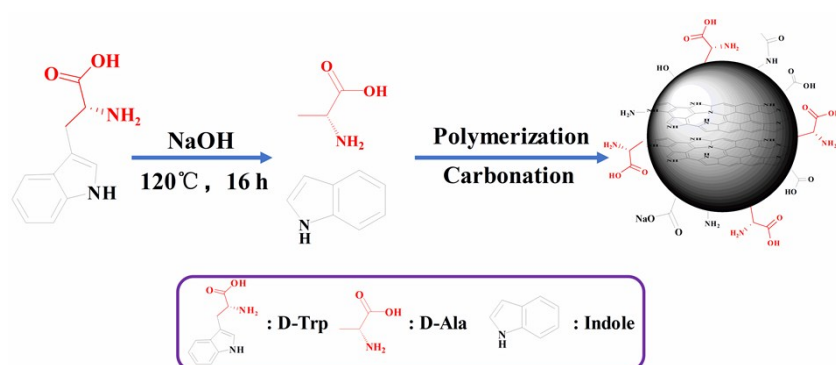

Fig. S5 Synthetic mechanism diagram of D-CQDs
